# Supplementary material for: The Comparative Survey of Coordinated Regulation of Steroidogenic Pathway in Japanese Flounder (Paralichthys olivaceus) and Chinese Tongue Sole (Cynoglossus semilaevis)
Source: MDPI journal article supplement (doi:10.3390/ijms23105520), 2022-05-15
Supplement: s1 [file s1]

| Gene               |                | <i>Hsa</i> | <i>Mmu</i> | <i>Gga</i> | <i>Xtr</i> | <i>Loc</i> | <i>Dre</i> | <i>Gac</i> | <i>Ola</i> | <i>Tru</i> | <i>Cse</i> | <i>Pol</i> |
|--------------------|----------------|------------|------------|------------|------------|------------|------------|------------|------------|------------|------------|------------|
| <b><i>Star</i></b> | <i>star</i>    | 1          | 1          | 1          | 1          | 1          | 1          | 1          | 1          | 1          | 3          | 1          |
|                    | <i>star2</i>   | 0          | 0          | 0          | 0          | 1          | 1          | 1          | 1          | 1          | 1          | 1          |
| <b><i>Cyp</i></b>  | <i>cyp1a</i>   | 2          | 2          | 2          | 1          | 1          | 1          | 1          | 1          | 2          | 1          | 1          |
|                    | <i>cyp1b</i>   | 1          | 1          | 1          | 1          | 1          | 1          | 1          | 1          | 1          | 1          | 1          |
|                    | <i>cyp1c</i>   | 0          | 0          | 1          | 1          | 1          | 2          | 2          | 1          | 2          | 2          | 0          |
|                    | <i>cyp1d</i>   | 0          | 0          | 0          | 1          | 1          | 1          | 1          | 1          | 0          | 0          | 1          |
|                    | <i>cyp11a</i>  | 1          | 1          | 1          | 1          | 1          | 2          | 1          | 1          | 1          | 1          | 1          |
|                    | <i>cyp11c</i>  | 2          | 2          | 0          | 1          | 0          | 1          | 1          | 1          | 1          | 1          | 1          |
|                    | <i>cyp17a</i>  | 1          | 1          | 1          | 1          | 2          | 2          | 2          | 2          | 2          | 2          | 2          |
|                    | <i>cyp19a</i>  | 1          | 1          | 1          | 1          | 1          | 2          | 2          | 2          | 1          | 2          | 2          |
|                    | <i>cyp21a</i>  | 1          | 1          | 1          | 1          | 0          | 1          | 1          | 1          | 1          | 1          | 1          |
|                    | <i>cyp26a</i>  | 1          | 1          | 1          | 1          | 1          | 1          | 1          | 1          | 1          | 1          | 1          |
|                    | <i>cyp26b</i>  | 1          | 1          | 1          | 1          | 1          | 1          | 1          | 1          | 1          | 1          | 1          |
|                    | <i>cyp26c</i>  | 1          | 1          | 1          | 1          | 1          | 1          | 1          | 1          | 1          | 1          | 1          |
|                    | <i>cyp27a</i>  | 1          | 1          | 1          | 1          | 1          | 4          | 1          | 1          | 1          | 1          | 1          |
|                    | <i>cyp27b</i>  | 1          | 1          | 0          | 1          | 1          | 1          | 1          | 1          | 1          | 1          | 1          |
|                    | <i>cyp27c</i>  | 1          | 0          | 1          | 1          | 0          | 1          | 1          | 1          | 1          | 1          | 1          |
| <b><i>Hsd</i></b>  | <i>hsd3b</i>   | 3          | 7          | 3          | 2          | 2          | 3          | 2          | 3          | 2          | 2          | 2          |
|                    | <i>hsd11b1</i> | 2          | 1          | 3          | 3          | 1          | 2          | 2          | 2          | 1          | 2          | 1          |
|                    | <i>hsd11b2</i> | 1          | 1          | 1          | 1          | 1          | 1          | 1          | 1          | 1          | 1          | 1          |
|                    | <i>hsd17b</i>  | 14         | 15         | 11         | 12         | 6          | 11         | 9          | 10         | 9          | 10         | 11         |
|                    | <i>hsd20b2</i> | 0          | 0          | 0          | 0          | 1          | 1          | 1          | 1          | 1          | 1          | 1          |
| <b><i>Esr</i></b>  | <i>esr1</i>    | 1          | 1          | 1          | 1          | 1          | 1          | 1          | 1          | 1          | 1          | 1          |
|                    | <i>esr2</i>    | 1          | 1          | 1          | 1          | 1          | 2          | 2          | 2          | 2          | 2          | 2          |
| <b><i>Ar</i></b>   | <i>ar</i>      | 1          | 1          | 1          | 1          | 1          | 1          | 2          | 2          | 2          | 2          | 2          |
| <b>Total</b>       |                | <b>39</b>  | <b>42</b>  | <b>35</b>  | <b>37</b>  | <b>29</b>  | <b>46</b>  | <b>40</b>  | <b>41</b>  | <b>38</b>  | <b>42</b>  | <b>39</b>  |
